# Supplementary material for: Direct measurement of the genuine efficiency of thermogalvanic heat-to-electricity conversion in thermocells
Source: Royal Society of Chemistry journal article supplement (doi:10.1039/d1sc06340e), 2022-01-01
Supplement: d1sc06340e1.pdf [file d1sc06340e1.pdf]

Electronic Supplementary Information for:

Direct measurement of the genuine efficiency of the  
thermogalvanic heat flux-to-electricity conversion in  
thermocells

Maria A. Trosheva,<sup>a</sup> Mark A. Buckingham,<sup>a,b</sup> and Leigh Aldous<sup>a\*</sup>

<sup>a</sup> Department of Chemistry, Britannia House, King's College London, London, SE1 1DB, UK

<sup>b</sup> Present address: Department of Materials, The University of Manchester, Oxford Road,  
Manchester, M13 9PL, UK

\* Corresponding author: [leigh.aldous@kcl.ac.uk](mailto:leigh.aldous@kcl.ac.uk)

## **Table of Contents:**

**Table S1:** Summary of experimental data for thermogalvanic cells without the heat flux sensor (page 3)

**Table S2:** Summary of experimental data for thermogalvanic cells with the heat flux sensor thermally in-series (page 4)

**Figure S1:** Plots of absolute efficiency and power to support Figures 5 and 6 (page 5)

**Figure S2:** Plots of the power generated as a function of electrode separation, plotting gelled vs ungelled and with vs without the heat flux sensor thermally in-series (page 6)

**Table S3:** Summary of experimental data for thermogalvanic cells with and without the heat flux sensor thermally in-series, as a function of gelation and electrode separation (page 7)

**Table S1.** Summary of the thermogalvanic power measured as a function of electrode separation distance (top) and applied temperature difference (bottom) for the thermogalvanic cell without the heat flux sensor in-series; all other details are as per Figure 1.

| Experimental Conditions |            |            | Thermogalvanic Measurement Results |                        |                                      |                                       |
|-------------------------|------------|------------|------------------------------------|------------------------|--------------------------------------|---------------------------------------|
| $d$ / mm                | $T_h$ / °C | $T_c$ / °C | $\Delta T_{\text{exp}}$ / K        | $-V_{\text{ocp}}$ / mV | $-j_{\text{sc}}$ / A m <sup>-2</sup> | $P_{\text{max}}$ / mW m <sup>-2</sup> |
| 4.4                     | 40         | 20         | 17.8                               | 24.9                   | 15.4                                 | 96                                    |
| 9.5                     |            |            | 18.0 (± 0.6)                       | 25.3 (± 0.1)           | 12.3 (± 0.5)                         | 78 (± 5)                              |
| 18.9                    |            |            | 18.3                               | 25.6                   | 9.1                                  | 58                                    |
| 29.3                    |            |            | 18.2 (± 0.2)                       | 25.4 (± 0.3)           | 5.8 (± 1.3)                          | 37 (± 8)                              |
| 39.9                    |            |            | 18.2                               | 25.5                   | 4.2                                  | 27                                    |
| 29.3                    | 40         | 20         | 18.3                               | 25.6                   | 12.2                                 | 78                                    |
|                         | 45         | 20         | 22.9                               | 32.1                   | 14.3                                 | 115                                   |
|                         | 50         | 20         | 27.4                               | 38.3                   | 18.9                                 | 181                                   |
|                         | 55         | 20         | 31.8                               | 44.5                   | 25.0                                 | 278                                   |
|                         | 60         | 20         | 36.2                               | 50.7                   | 29.3                                 | 371                                   |

**Key for Tables S1, S2 and S3:**

Errors shown as (±) represent the standard deviation of triplicate measurements (Table S1) or between 3 to 5 repeat measurements (Table S2)

$d$  = Electrode separation distance

$T_h$  and  $T_c$  = applied temperature to the hot and cold electrodes, respectively

$\Delta T_{\text{exp}}$  = experienced temperature difference, based upon the  $V_{\text{ocp}}$

$V_{\text{ocp}}$  = Open circuit potential difference across the hot and cold electrodes

$j_{\text{sc}}$  = Steady state short circuit current density

$P_{\text{max}}$  = Maximum thermogalvanic power density

$p_{\text{max}}$  = Absolute maximum thermogalvanic power generated by the cell

$q_{\text{empty}}$  = Steady state, absolute heat flux through the empty cell

$q_{\text{total}}$  = Steady state, absolute heat flux through the cell filled with electrolyte

$q_m$  = Measured heat flux, with  $q_{\text{empty}}$  subtracted from  $q_{\text{total}}$  to afford the electrolyte-only cell-subtracted heat flux

$\eta_m$  = Absolute efficiency of thermogalvanic conversion, using measured  $p_{\text{max}}$  and measured  $q_m$

$\eta_{r,m}$  = Carnot cycle relative measured efficiency of thermogalvanic conversion at the experienced temperatures  $T_s$  and  $T_c$ , where  $T_s = T_h - (T_h - T_c - \Delta T_{\text{exp}})$

$q_e$  = Estimated electrolyte-only heat flux using Fourier's Law

$\eta_e$  = Estimated absolute efficiency of thermogalvanic conversion, using measured  $p_{\text{max}}$  and estimated  $q_e$

$\eta_{r,e}$  = Estimated Carnot cycle relative efficiency of thermogalvanic conversion, using estimated heat flux and the experienced temperatures  $T_s$  and  $T_c$

**Table S2.** Summary of both the thermogalvanic power and heat flux sensor measurements as a function of electrode separation distance ( $d$ , top) and applied temperature difference ( $\Delta T$ , bottom) for the thermogalvanic cell with the heat flux sensor in-series; all other details are as per Figure 1.

| Experimental Conditions |            |            | Thermogalvanic Measurement Results |                        |                                      |                                      |                       | Heat Flux Sensor Measurement Results |                         |               | Measured Efficiencies         |                    | Estimated Heat Flux and Estimated Efficiencies |                               |                  |
|-------------------------|------------|------------|------------------------------------|------------------------|--------------------------------------|--------------------------------------|-----------------------|--------------------------------------|-------------------------|---------------|-------------------------------|--------------------|------------------------------------------------|-------------------------------|------------------|
| $d$ / mm                | $T_h$ / °C | $T_c$ / °C | $\Delta T_{\text{exp}}$ / K        | $-V_{\text{ocp}}$ / mV | $-j_{\text{sc}}$ / A m <sup>-2</sup> | $P_{\text{max}}$ / mWm <sup>-2</sup> | $p_{\text{max}}$ / μW | $q_{\text{empty}}$ / mW              | $q_{\text{total}}$ / mW | $q_m$ / mW    | $\eta_m$ / 10 <sup>-3</sup> % | $\eta_{r,m}$ / %   | $q_e$ / mW                                     | $\eta_e$ / 10 <sup>-3</sup> % | $\eta_{r,e}$ / % |
| 4.4                     |            |            | 15.3                               | 21.5                   | 14.2                                 | 76                                   | 7.1                   | 73                                   | 312                     | 239           | 3.0                           | 0.060              | 180                                            | 4.0                           | 0.08             |
| 9.5                     |            |            | 16.1<br>(± 0.7)                    | 22.5<br>(± 0.9)        | 11.4<br>(± 0.3)                      | 65<br>(± 2)                          | 6.1<br>(± 0.1)        | 68<br>(± 12)                         | 316<br>(± 21)           | 248<br>(± 24) | 2.4<br>(± 0.2)                | 0.047<br>(± 0.005) | 87.5<br>(± 3.6)                                | 6.9<br>(± 0.3)                | 0.13<br>(± 0.1)  |
| 18.9                    | 40         | 20         | 16.3                               | 22.9                   | 7.2                                  | 41                                   | 3.9                   | 49                                   | 317                     | 268           | 1.4                           | 0.027              | 44.8                                           | 8.7                           | 0.16             |
| 29.3                    |            |            | 16.7<br>(± 0.7)                    | 23.4<br>(± 0.1)        | 5.6<br>(± 0.4)                       | 33<br>(± 3)                          | 3.1<br>(± 0.3)        | 36<br>(± 4)                          | 272<br>(± 17)           | 236<br>(± 17) | 1.3<br>(± 0.2)                | 0.024<br>(± 0.003) | 29.6<br>(± 1.2)                                | 10.4<br>(± 0.1)               | 0.19<br>(± 0.2)  |
| 39.9                    |            |            | 16.0                               | 22.3                   | 4.3                                  | 24                                   | 2.3                   | 22                                   | 281                     | 259           | 0.9                           | 0.017              | 20.7                                           | 11.0                          | 0.21             |
|                         | 40         | 20         | 16.1                               | 22.5                   | 11.4                                 | 65                                   | 6.1                   | 68                                   | 316                     | 248           | 2.4                           | 0.047              | 87.5                                           | 6.9                           | 0.13             |
|                         | 45         | 20         | 19.7                               | 27.6                   | 14.7                                 | 101                                  | 9.5                   | 91                                   | 385                     | 295           | 3.2                           | 0.051              | 107                                            | 8.9                           | 0.14             |
| 9.5                     | 50         | 20         | 23.5                               | 32.9                   | 17.9                                 | 147                                  | 13.8                  | 110                                  | 478                     | 368           | 3.7                           | 0.050              | 128                                            | 10.8                          | 0.15             |
|                         | 55         | 20         | 27.3                               | 38.2                   | 20.7                                 | 197                                  | 18.6                  | 128                                  | 567                     | 439           | 4.2                           | 0.050              | 149                                            | 12.5                          | 0.15             |
|                         | 60         | 20         | 30.1                               | 42.2                   | 26.6                                 | 280                                  | 26.4                  | 145                                  | 729                     | 584           | 4.5                           | 0.048              | 164                                            | 16.1                          | 0.17             |

**Figure S1.** Plots of (a) the absolute thermogalvanic conversion efficiency as a function of electrode separation (Carnot-relative efficiency shown in Figure 5(c)); (b) thermogalvanic power generated with and without the heat flux sensor in-series vs the experienced temperature difference,  $\Delta T_{\text{exp}}$  (the same power plotted vs the applied temperature difference,  $\Delta T_{\text{app}}$ , is shown in Figure 6(a)), and (c) the absolute thermogalvanic conversion efficiency as a function of  $\Delta T_{\text{app}}$  (Carnot-relative efficiency shown in Figure 6(d)). Please refer to Figures 5 and 6 for full experimental details.

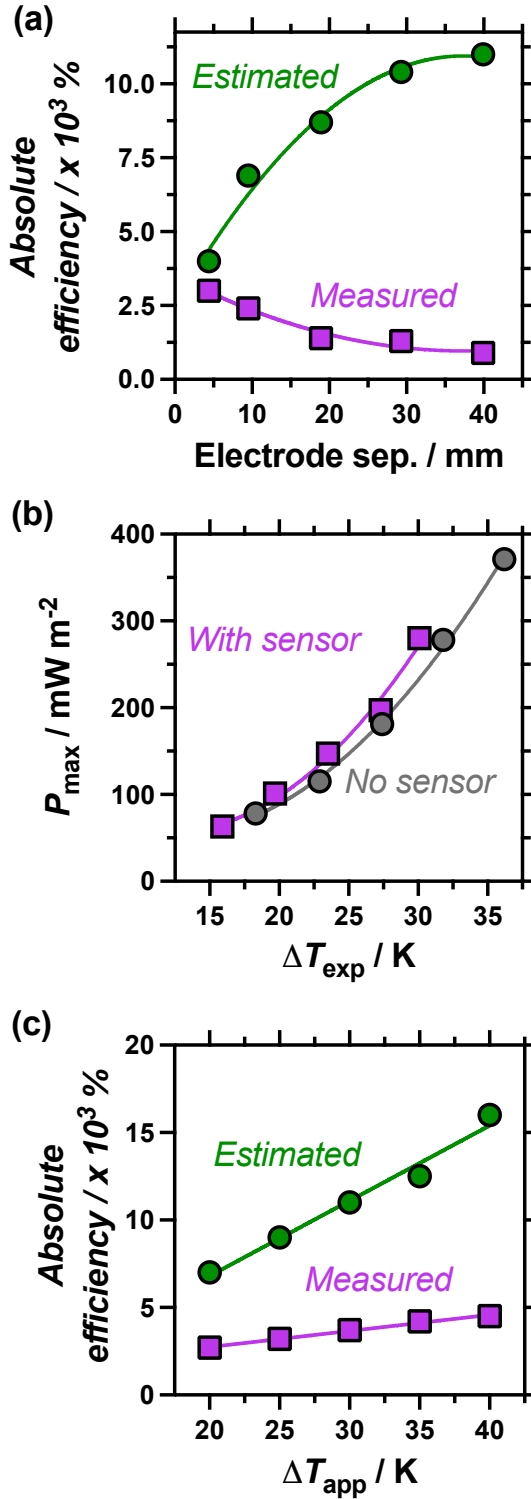

**Figure S2.** Plot of the thermogalvanic power generated by the as-prepared 0.4 M  $K_3/K_4[Fe(CN)_6]$  at  $\Delta T_{app} = 20$  K, using partially filled 3-sided cells (see Experimental for full details). They were measured with (purple) and without (grey) the heat flux sensor in-series, either with 3 wt% eq. of sodium acrylate powder added (labelled as gelled; hexagon and diamond) or prior to the addition of the sodium acrylate powder (circle and square). Reported as a function of electrode separation (13.6, 20.9 and 29.2 mm).

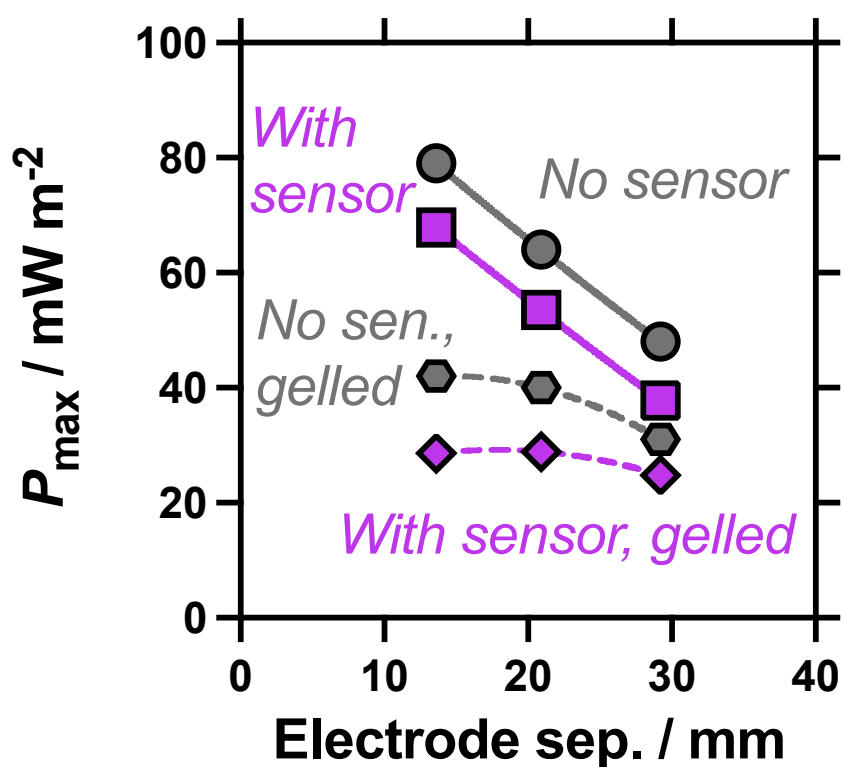

**Table S3.** Summary of the thermogalvanic and heat flux sensor measurements, investigated as a function of electrode separation distance ( $d$ ) and the weight percent equivalent of sodium polyacrylate powder added to the cell as a gelling agent. Measurements were performed with heat flux sensor in series (bottom) or without the heat flux sensor present (top). Measurements were performed in a 3-sided cell with the cell partially filled, as detailed in the Experimental section. All values are the average of between 2 to 4 repeat measurements.

| Experimental Conditions |           | Thermogalvanic Measurement Results |                        |                                      |                                       |                                  | Heat Flux Sensor Measurement Results |                         |                     | Measured Efficiencies                  |                         | Estimated Heat Flux and Estimated Efficiencies |                                        |                         |
|-------------------------|-----------|------------------------------------|------------------------|--------------------------------------|---------------------------------------|----------------------------------|--------------------------------------|-------------------------|---------------------|----------------------------------------|-------------------------|------------------------------------------------|----------------------------------------|-------------------------|
| $d$ / mm                | Gel / wt% | $\Delta T_{\text{exp}}$ / K        | $-V_{\text{ocp}}$ / mV | $-j_{\text{sc}}$ / A m <sup>-2</sup> | $P_{\text{max}}$ / mW m <sup>-2</sup> | $p_{\text{max}}$ / $\mu\text{W}$ | $q_{\text{empty}}$ / mW              | $q_{\text{total}}$ / mW | $q_{\text{m}}$ / mW | $\eta_{\text{m}}$ / 10 <sup>-3</sup> % | $\eta_{\text{r,m}}$ / % | $q_{\text{c}}$ / mW                            | $\eta_{\text{c}}$ / 10 <sup>-3</sup> % | $\eta_{\text{r,c}}$ / % |
| 13.6                    | 0         | 18.4                               | 25.7                   | 12.3                                 | 79                                    | 5.6                              | n/a                                  | n/a                     | n/a                 | n/a                                    | n/a                     | n/a                                            | n/a                                    | n/a                     |
|                         | 3         | 19.7                               | 27.6                   | 6.5                                  | 42                                    | 3.2                              | n/a                                  | n/a                     | n/a                 | n/a                                    | n/a                     | n/a                                            | n/a                                    | n/a                     |
| 20.9                    | 0         | 18.4                               | 25.8                   | 9.9                                  | 64                                    | 4.6                              | n/a                                  | n/a                     | n/a                 | n/a                                    | n/a                     | n/a                                            | n/a                                    | n/a                     |
|                         | 3         | 19.5                               | 27.3                   | 5.9                                  | 40                                    | 2.9                              | n/a                                  | n/a                     | n/a                 | n/a                                    | n/a                     | n/a                                            | n/a                                    | n/a                     |
| 29.2                    | 0         | 18.5                               | 25.9                   | 7.4                                  | 48                                    | 3.5                              | n/a                                  | n/a                     | n/a                 | n/a                                    | n/a                     | n/a                                            | n/a                                    | n/a                     |
|                         | 3         | 19.4                               | 27.2                   | 4.5                                  | 31                                    | 2.2                              | n/a                                  | n/a                     | n/a                 | n/a                                    | n/a                     | n/a                                            | n/a                                    | n/a                     |
| 13.6                    | 0         | 17.1                               | 23.9                   | 11.4                                 | 67.9                                  | 4.8                              | 72                                   | 186                     | 114                 | 4.2                                    | 0.077                   | 49                                             | 9.8                                    | 0.179                   |
|                         | 1.5       | 18.6                               | 26.1                   | 10.1                                 | 65.8                                  | 4.7                              | 72                                   | 101                     | 29                  | 16.1                                   | 0.269                   | 54                                             | 8.7                                    | 0.146                   |
|                         | 3         | 18.2                               | 25.5                   | 4.5                                  | 28.6                                  | 2.0                              | 72                                   | 90                      | 18                  | 11.6                                   | 0.197                   | 53                                             | 3.9                                    | 0.066                   |
| 20.9                    | 0         | 17.0                               | 23.8                   | 9.0                                  | 53.5                                  | 3.8                              | 73                                   | 197                     | 124                 | 3.1                                    | 0.056                   | 32                                             | 11.9                                   | 0.218                   |
|                         | 3         | 18.9                               | 26.5                   | 4.4                                  | 28.9                                  | 2.1                              | 73                                   | 97                      | 25                  | 8.3                                    | 0.137                   | 35                                             | 5.8                                    | 0.096                   |
| 29.2                    | 0         | 16.6                               | 23.2                   | 6.5                                  | 37.8                                  | 2.8                              | 75                                   | 206                     | 131                 | 2.1                                    | 0.039                   | 23                                             | 12.1                                   | 0.226                   |
|                         | 3         | 18.9                               | 26.4                   | 3.8                                  | 24.8                                  | 1.8                              | 75                                   | 121                     | 46                  | 3.9                                    | 0.065                   | 26                                             | 7.0                                    | 0.116                   |
